# Supplementary material for: Attitudes of physicians and patients towards disclosure of genetic information to spouse and first-degree relatives: a case study from Turkey
Source: PubMed Central journal article supplement (PMC4029893; doi:10.1186/1472-6939-15-39), 2014-05-16

**Değerli Katılımcı,**

Son 20 yılda insan genetiği alanında olağanüstü gelişmeler yaşanmaktadır. Özellikle genetik hastalıkların tanımlanmasında yaşanan bu gelişmeler bazı etik/ahlak sorunlarının ortaya çıkmasına neden olmaktadır. Elde edilen genetik bilginin kime ait olduğu ve kimlerle paylaşılması gerektiği tartışmaların merkezindedir. Planladığımız bu çalışmayla, testi öneren hekimler ile test yaptıran kişilerin genetik bilgilerin açıklanması ve paylaşılması hakkındaki tutum ve tercihlerini öğrenmek amaçlanmıştır. Çalışmayla elde edilecek bilgiler doğrultusunda ülkemize özgü kuralların oluşumuna katkı sunabilmeyi hedeflemekteyiz.

*Katkılarınız için teşekkür ederiz.*

Prof. Dr. Nermin ERSOY (Tez Danışmanı), Arş. Gör. Aslıhan AKPINAR (Tez Yürütücüsü)

**I. DEMOGRAFİK ÖZELLİKLER**

1. Cinsiyetiniz :  Erkek  Kadın 2. Yaşınız: .....
3. Medeni durumunuz:  Evli  Bekar 4. Çocuğunuz:  Var  Yok
5. Dinin yaşamınızdaki yeri?  Önemlidir  Ne önemli ne önemsizdir  Önemli değildir
6. Politik görüşünüzü tek kelimeyle nasıl ifade edersiniz? .....
7. Herhangi bir işte çalışıyor musunuz?  Evet  Hayır 8. Mesleğiniz? .....
9. Eğitim durumunuz?  Okur-yazar değil  Okur-yazar  İlkokul  Ortaokul  
 Lise  Ön-Lisans  Lisans  Diğer .....
10. Genetik hastalıklar ve genetik testler konusunda ne kadar bilgi sahibisiniz?  
 Yeterli  Orta düzeyde  Yetersiz  Hic bilgin yok

**II. TEST BİLGİSİ**

11. Size yaptıracağımız test hakkında bilgi verildi mi?  
 Evet  Hayır
12. Evet ise, kim tarafından verildi?  
 Testi öneren doktor  Testi yapacak olan uzman  ya da (lütfen yazınız) .....
13. Bu genetik testin sonucunun size açıklanmasını ister misiniz?  
 Evet  Hayır 13a. Neden?.....

**III. GENETİK BİLGİNİN KULLANILMASI İLİŞKİN TERCİHLER**

14. Sizce genetik bilgiler hastalık ve tedavilerle ilgili tıbbi bilgilerden farklı mıdır?  
 Evet  Hayır 14a. Neden?.....
15. Sizce genetik test sonucunda elde edilen bilgi kime aittir?  
 Bireye ait bir bilgidir.  Aileye ait bir bilgidir.  Etnik gruba ait bir bilgidir.  
 Devlete ait bir bilgidir.  İnsanlığa ait bir bilgidir.
16. Yaptırdığımız genetik testin sonuçlarının kimlerle paylaşılmasına izin verirsiniz? (Gerektiğinde birden fazla seçenek işaretleyebilirsiniz):  
 Eşimle / Partnerimle  Genetik bağım olan aile üyelerimle (bir sınırlandırmanız var mı?.....)  
 Sosyal bağım olan diğer kişilerle  Sigorta şirketimle .....  
 İşverenimle  Diğer doktorlarla .....  
 Hiçbiriyle
17. Sizce reşit olmayan kişilere ait genetik bilgiler kaç yaşından itibaren kendileriyle paylaşılabilir? .....
18. Test sonucunda ailede başkalarını da ilgilendirebilecek bir bilgi elde edilse bile, onlarla paylaşmama hakkınız olduğuna inanıyor musunuz?  
 Evet  Hayır
19. Bu bilgiden etkilenebilecek olan aile üyelerinize hangi durum/durumlarda açıklama yapılmasını kabul edersiniz? (Gerektiğinde birden fazla seçenek işaretlenebilir):  
 Erken tanı ile hastalığın kontrol altına alınabileceği durumlarda  
 Erken tedavi ile yaşam kalitesinin ya da süresinin artırılabilceği durumlarda  
 Koruyucu önlemlerle yaşam kalitesinin ya da süresinin artırılabilceği durumlarda  
 Cinsel kimlik değişiminin sözkonusu olduğu durumlarda  
 Kariyer tercihlerinin etkilenebileceği durumlarda  
 Eş seçiminin etkilenebileceği durumlarda  
 Üremeye ilişkin tercihlerin etkilenebileceği durumlarda  
 Hiçbir etkisi olmasa da aile üyelerimin de genetik yapısına ait bir bilgi olduğu için her durumda

20. Genetik test sonuçları hastaya kim tarafından açıklanmalıdır?

- Testi öneren doktor  Testi yapan uzman  
 Özel eğitim almış genetik danışman ya da  .....

21. Genetik test bilgilerinin gizliliği en iyi nasıl sağlanır?

- Tüm tıbbi kayıtlar nasıl korunuyorsa genetik bilgiler de öyle korunmalıdır  
 Test yapan özel kuruluş ya da devlet kuruluşu genetik bilgilerin korunması için özel önlemler almalıdır  
 Devlet genetik bilgilerin korunmasını düzenlemeli ve denetlemelidir

22. Genetik bilgilerin nasıl kullanılacağı hakkında o sağlık kurumunun ya da devletin kuralları olmalı mıdır?

- Evet  Hayır

23. Genetik danışmanlığın ne olduğunu biliyor musunuz?  Evet  Hayır

23. Devlet genetik test yaptıracak olan herkese genetik danışmanlık sağlamalı mıdır?

- Evet  Hayır

**IV. OLGULAR:** Aşağıdaki olgular etik konuları göz önünde bulundurularak senaryolaştırılmış olgulardır. Gerçek hasta veya hekim isimleri kullanılmamıştır. Lütfen kendinizi her bir vakada test yaptıran kişinin yerine koyarak size uygun gelen ifadeyi seçiniz.

**OLGU A.** 26 yaşındaki Nurgül'ün bebeği erken doğmuştur. Bebeğin Down sendromu olmasından şüphelenen doktor test önerir ve test sonucunda doktorun şüphesi doğrulanır. Down sendromunun nedenleri arasında annenin gebelik yasının yüksek olması, anne veya babanın genetik olarak taşıdığı bazı bozukluklar da sayılabilir. İkinci bir çocuk sahibi olmak isteyen Nurgül ısrarla bebeklerinin neden Down sendromu olduğunu araştırılmasını, kendisine ve eşine genetik testler yapılmasını ister. Baba gönülsüzce de olsa eşinin ısrarına dayanamayarak test yapılmasını kabul eder. Test sonucunda babanın genetik bozukluğunun bebekte hastalığın olmasına neden olduğu öğrenilir. 30 yaşındaki babanın kendisinden daha genç kardeşleri vardır. Doktor babaya eşine ve kardeşlerine durumu hakkında bilgi vermesini önerir. Fakat koca başka çocuk istemediğini, kardeşleriyle de arasının iyi olmadığını söyleyerek bilgi vermeyi reddeder.

24. Doktor, babanın kararına saygı duymalıdır.

- Katılıyorum  Kararsızım  Katılmıyorum

25. Doktor, baba istemese bile sonucu Nurgül'e bildirmelidir.

- Katılıyorum  Kararsızım  Katılmıyorum

26. Doktor aile birliğini korumak adına Nurgül'e gerçeği açıklamamalıdır.

- Katılıyorum  Kararsızım  Katılmıyorum

27. Doktor, babanın kardeşlerini de sonuçtan haberdar etmelidir.

- Katılıyorum  Kararsızım  Katılmıyorum

28. Babanın, kardeşlerine açıklama yapma ve onları test yaptırmaya yönlendirme yükümlülüğü olmalıdır.

- Katılıyorum  Kararsızım  Katılmıyorum

29. Bu tür durumlarda devlet, ücretsiz test yapmakla yükümlü olmalıdır.

- Katılıyorum  Kararsızım  Katılmıyorum

**OLGU B.** 21 yaşındaki Fevziye bedensel görünümünde, cinsel organlarında ve duygularındaki farklılıklardan dolayı bir kadın doğum uzmanına başvurur. Yalancı çift cinsiyetli olduğu belirlenen hastaya yapılan test sonucunda erkek kromozomlarına sahip olduğu görülür. Fakat erkek cinsel organının gelişmesine engel olan bir bozukluğu vardır. Fevziye ile sonuçlar hakkında görüşüldüğünde böyle bir sonuç beklediğini, zaten duygusal olarak da erkek gibi hissettiğini söyler. Doktor, Fevziye'nin 16 yaşındaki kız kardeşi Şükriye'de de fiziksel görünümünden dolayı benzer durumdan şüphelenir ve aynı testlerin ona da yapılmasını önerir. Çünkü bozukluğun 1:8 oranında diğer kardeşte de görülme ihtimali vardır. Fakat Fevziye bu öneriye şiddetle karşı çıkar. Kardeşi liseyi bitirdiğinde ona testleri yaptıracığına söz verir. Ancak doktor, test yapılmasının ertelenmesinin kardeşine zarar verebileceğini, kardeşinin duygusal sorunlar yaşayabileceğini açıklayarak test yapılması için ısrar eder.

30. Doktor, Fevziye'nin kararına saygı duymalıdır.

- Katılıyorum  Kararsızım  Katılmıyorum

31. Doktor dosya bilgilerinden aileye ulaşarak Şükriye'ye de test yaptırılması gerektiğini söylemelidir.

- Katılıyorum  Kararsızım  Katılmıyorum

32. Doktor, Şükriye'ye ulaşarak kendisine de abisine/ablasına yapılan testlerin yapılması gerektiğini söylemelidir.

- Katılıyorum  Kararsızım  Katılmıyorum

33. Doktorun, Fevziye kabul etmese dahi aile üyelerini uyarmakla ilgili yasal ödevi olmalıdır.

- Katılıyorum  Kararsızım  Katılmıyorum

34. Fevziye'nin, kardeşine açıklama yapma ve onu test yaptırmaya cesaretlendirme ödevi olmalıdır.

- Katılıyorum  Kararsızım  Katılmıyorum

35. Bu tür durumlarda devlet, testi ücretsiz yapmakla yükümlü olmalıdır.

- Katılıyorum  Kararsızım  Katılmıyorum

**OLGU C.** On beş aylık olan Bebek Can dördüncü ayından beri solukluk, huzursuzluk, uykusuzluk, iyi kilo alamama yakınmalarıyla doktora getirilmiştir. Öyküsünden birkaç kez kan nakli yapıldığı öğrenilir. Çocuk doktoru tarafından ağır bir kan hastalığı olan talasemi majör tanısı konur. Bu kalıtsal hastalık taşıyıcı olan bireylerde kendini göstermez. Ancak hem anneden hem babadan hastalık genlerini almış olan çocuklarda ortaya çıkar. Taşıyıcı olanların kan bağı olan akrabaları da taşıyıcı olabilir. Anne-baba çocuklarının bu durumuna çok üzülmele birlikte ailenin olumsuz baskısını engellemek için onlara bilgi verilmesini istememektedirler.

**36. Doktor, ilerideki gebeliğinde yaptrabileceği testler hakkında anneyi bilgilendirmelidir.**

Katılıyorum  Kararsızım  Katılmıyorum

**37. Doktor, çifti talasemi majör hastası bir başka çocuk dünyaya getirmemeye ikna etmeye çalışmalıdır.**

Katılıyorum  Kararsızım  Katılmıyorum

**38. Doktor, anne-babayı, akrabalarını hastalık hakkında bilgilendirmeleri için uyarmalıdır.**

Katılıyorum  Kararsızım  Katılmıyorum

**39. Doktor, çiftin akrabalarını uyardığından emin olmalıdır.**

Katılıyorum  Kararsızım  Katılmıyorum

**40. Doktorun çiftin akrabalarını uyarmakla ilgili yasal ödevi olmalıdır.**

Katılıyorum  Kararsızım  Katılmıyorum

**41. Devlet çocukların sağlığını korumak adına bu testleri ücretsiz yaptırmalıdır.**

Katılıyorum  Kararsızım  Katılmıyorum

**OLGU D.** 14 yaşındaki Mustafa bir üniversite hastanesine tansiyon artışı ile başvurur. Mustafa yaşına göre kısa boyludur, gelişme geriliği olduğunu düşünen doktor kromozom analizi yaptırır. Test sonucunda Mustafa'nın erkek kromozomları olduğu belirlenir. Çocuk doktoru hastanın bebekliğinde bir başka üniversite hastanesinde doğumsal adrenal hiperplazi tanısı almış olduğunu öğrenir. Bu hastalık böbrek üstü bezlerinin aşırı büyümesi ve buradaki bazı enzimlerin eksikliği sonucu meydana gelir ve yalancı çift cinsiyetliliğe neden olur. Doktor ilk tanıyı koyan hastanedeki meslektaşıyla yaptığı görüşmede Mustafa'nın amcasının kızının da aynı tanıyı aldığını fakat kız olarak yetiştirildiğini öğrenir. Doktor bu bilgiyi Mustafa'nın ailesiyle paylaşır. Baba yıllardır konuşmadığı erkek kardeşiyle görüşerek çocuklarının benzer hastalığından söz eder. Bunun üzerine amca kendilerine ait bilgileri izinleri olmadan paylaştığı için ilk tanıyı koyan üniversite hastanesine karşı dava açar.

**42. İlk tanıyı koyan doktor bilgi sahiplerinin iznini almadan bu bilgileri paylaşmamalıydı.**

Katılıyorum  Kararsızım  Katılmıyorum

**43. Doktor meslektaşından öğrendiği bilgileri hastasının ailesine açıklamamalıydı.**

Katılıyorum  Kararsızım  Katılmıyorum

**44. Doktor, amca kızının genetik bilgilerini sadece Mustafa'ya açıklamalıydı.**

Katılıyorum  Kararsızım  Katılmıyorum

**45. Amca, Mustafa'yı da ilgilendiren bu bilgileri daha önce kardeşiyle paylaşmalıydı.**

Katılıyorum  Kararsızım  Katılmıyorum

**46. Genetik bilgiler, doktorlar arasında olsa bile yasal düzenlemelere göre paylaşılmalıdır.**

Katılıyorum  Kararsızım  Katılmıyorum

**47. Hastanenin/hekimlerin genetik bilgilerin emniyetini sağlama yükümlülüğü olmalıdır.**

Katılıyorum  Kararsızım  Katılmıyorum

**48. Hasta hangi uzmanlık dalı tarafından yönlendirilmiştir?**

Kadın - doğum

Çocuk Hastalıkları

**49. Yapıtırlacak test türü nedir?**

Moleküler genetik

Prenatal test

Sitogenetik

**50. Hastanın .....  Kendisi**

Annesi

Babası ... ..

ile görüşülmüştür.

**51. Şüphe edilen durum nedir?**

**52. Hastanın sigorta türü nedir?**

Özel

Devlet

İletmek istediğiniz bir bilgi veya not varsa lütfen yazınız.

**Katkılarınız için çok teşekkür ederiz**

.....  
.....  
.....  
.....

☺ Katkılarınız için çok teşekkür ederiz ☺

**Arş. Gör. Aslihan AKPINAR**

Adres: Kocaeli Üniversitesi Tıp Fakültesi Tıp Tarihi ve Etik Anabilim Dalı, 41380 Umuttepe-İzmit

Telefon: 0-262-303-74-50

E-posta: [aslyakcay@yahoo.com](mailto:aslyakcay@yahoo.com)

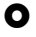

Supplement: 1472-6939-15-39-S3.pdf [file 1472-6939-15-39-S3.pdf]
