# Supplementary material for: Attitudes of physicians and patients towards disclosure of genetic information to spouse and first-degree relatives: a case study from Turkey
Source: PubMed Central journal article supplement (PMC4029893; doi:10.1186/1472-6939-15-39), 2014-05-16
Supplement: 1472-6939-15-39-S1.pdf [file 1472-6939-15-39-S1.pdf]

**Değerli Katılımcı,**

1990'ların sonlarından bu yana insan genetiği alanında olağanüstü gelişmeler yaşanmaktadır. Klinik genetikte ve özel olarak genetik testlerinde yaşanan bu gelişmeler özerklik, bireysel gizlilik ve mahremiyet gibi konulara ilişkin etik sorunların da ortaya çıkmasına neden olmaktadır. Elde edilen bireysel genetik bilgilere kimlerin, hangi şartlarda ulaşabileceği hakkında önemli oranda etik tartışmalar başlamıştır. Planladığımız bu çalışmayla, hekimlerden ve test yaptırmış kişilerden, elde edilen bireysel genetik bilgilerin açıklanması ve paylaşılması hakkında tutum ve tercihlerini öğrenmek amaçlanmıştır. Tarafların görüşleri doğrultusunda, yerel ve ulusal alanda bireysel genetik bilgilerin açıklanması ve gizliliğinin korunması hakkında bir etik tartışma başlatabilmeyi ve bu bağlamda kendimize özgü kuralların oluşumu için öneriler sunabilmeyi hedeflemekteyiz. **Katkılarınız için teşekkür ederiz.**

Prof. Dr. Nermin ERSOY (Tez Danışmanı), Arş. Gör. Aslıhan AKPINAR (Tez Yürütücüsü)

**I. KİŞİSEL ÖZELLİKLERİNİZ**

1. **Cinsiyetiniz :**  Erkek  Kadın **2. Yaşınız:.....** **3. Çocuğunuz:**  Var  Yok
4. **Uzmanlık alanınız ve varsa yan dal uzmanlık alanınız? .....**
5. **Uzman olarak kaç yıldır görev yapıyorsunuz? .....**
6. **Çalıştığınız kurumun türü** (İlgili seçeneklerden birden fazla işaretleyebilirsiniz):  
 Devlet Hastanesi  Üniversite Hastanesi  Özel Hastane  Muayenehane
7. **Genetik testler hakkında ne kadar bilgi sahibisiniz?**  
 Yeterli  Orta düzeyde  Yetersiz
8. **Dinin yaşamınızdaki yeri?**  Önemlidir  Ne önemli ne önemsizdir  Önemli değildir
9. **Politik görüşünüzü tek kelimeyle nasıl ifade edersiniz? .....**

**II. GENETİK TESTLERE İLİŞKİN UYGULAMALARINIZ**

10. **Günlük uygulamalarınız sırasında hastalarınıza genetik test öneriyor musunuz?**  
 Evet  Hayır (Hayır ise lütfen 15. soruya geçiniz ➔)
11. **Hangi sıklıkla genetik test öneriyorsunuz?**  
 Haftada en az 1 kez  Ayda en az 1 kez  6 ayda en az 1 kez  Ya da (lütfen yazınız) .....
12. **Önerdiğiniz genetik testlere ilişkin bilgileri nereden edindiniz?**  
 Tıp eğitimimden  Uzmanlık eğitimimden  İzlediğim bilimsel yayınlardan  
 Aldığım kurs/seminerlerden  Ya da (lütfen yazınız) .....
13. **Hastalarınıza genetik test sonuçları hakkında hangi durumlarda bilgi veriyorsunuz?**  
 Her zaman hastalarımın sonuç hakkında bilgi veriyorum  
 Sonucun hastaya tıbbi, psikolojik ve sosyal etkilerini göz önünde bulundurarak bilgi veriyorum  
 Hiçbir zaman hastalarımın sonuç hakkında bilgi vermiyorum → Neden? (lütfen yazınız).....
14. **Test yapılan kişiye sonucun açıklanmasını/açıklanmamasını hangi durumlarda tercih ediyorsunuz?** (Gerektiğinde birden fazla seçenek işaretleyebilirsiniz):  
 Kişinin veya ailesinin göreceği tıbbi, sosyal ya da ekonomik bir yarar olmadığında açıklamıyorum  
 Kişinin dışlanma ve damgalanma endişesi olduğunda açıklamıyorum  
 Sadece tanıyı doğruladığında açıklıyorum  
 Kişinin kendi genetik yapısıyla ilgili olduğu için her durumda açıklıyorum  
 Ya da (lütfen yazınız) .....

**III. GENETİK BİLGİNİN KULLANILIŞINA İLİŞKİN TERCİHLERİNİZ**

15. **Sizce kişinin genetik bilgileri diğer tıbbi bilgilerinden farklı mıdır?**  Evet  Hayır
16. **Sizce genetik test sonucunda elde edilen bilgi kime aittir?** (Lütfen tek seçenek işaretleyiniz)  
 Bireye ait bir bilgidir  Aileye ait bir bilgidir  Etnik gruba ait bir bilgidir  
 Devlete ait bir bilgidir  İnsanlığa ait bir bilgidir
17. **Sizce bir yetişkine ait genetik test sonuçları o kişiden başka kimlerle paylaşılabilir?** (Gerektiğinde birden fazla seçenek işaretleyebilirsiniz):  
 Eşiyle / Partneriyle  Genetik bağı olan aile üyeleriyle  
 Sosyal bağı olan diğer kişilerle  Sigorta şirketiyle  
 İşvereniyle  Diğer klinisyen meslektaşlarıyla  Hiç kimseyle
18. **Sizce reşit olmayan kişilere ait genetik bilgiler kaç yaşından itibaren kendileriyle paylaşılabilir? .....**
19. **Sizce kişi başkalarını da etkileyebilecek test sonucunu kimseyle paylaşmak istemediğinde, bu isteğine saygı gösterilmeli midir?**  
 Evet  Hayır

Sayfa 1/4 ➔

20. Sizce hangi durum/durumlarda genetik bilgidен etkilenebilecek aile üyelerine açıklama yapılmalıdır? (Gerektiğinde birden fazla seçenek işaretleyebilirsiniz):
- Erken tanıyla hastalığın kontrol altına alınabileceği durumlarda
- Cinsel kimlik değişiminin söz konusu olduğu durumlarda
- Erken tedaviyle yaşam kalitesinin ya da sağkallım süresinin artırılabilceği durumlarda
- Kariyer tercihlerinin etkilenebileceği durumlarda
- Koruyucu önlemlerle yaşam kalitesinin ya da sağkallım süresinin artırılabilceği durumlarda
- Eş seçiminin etkilenebileceği durumlarda
- Üremeye ilişkin tercihlerin etkilenebileceği durumlarda
- Hiçbir etkisi olmasa da, aile üyelerinin de genetik yapısına ait bir bilgi olduğu için her durumda
21. Sizce genetik test sonuçlarının hastaya kim tarafından açıklanması en uygundur?
- Testi öneren klinisyen  Testi yapan genetik uzmanı
- Özel eğitim almış genetik danışman  Ya da (lütfen yazınız) .....
22. Sizce genetik testlerden edinilen bilgilerin gizliliği en iyi nasıl sağlanır?
- Tüm tıbbi kayıtlar nasıl korunuyorsa genetik bilgiler de öyle korunmalıdır
- Test yapan özel kuruluş ya da devlet kuruluşu genetik bilgilerin korunması için özel önlemler almalıdır
- Devlet genetik bilgilerin korunmasını düzenlemeli ve denetlemelidir
- Ya da (lütfen yazınız) .....
23. Genetik bilgilerin açıklanması ve paylaşılmasına ilişkin kurumsal ya da ulusal kurallara ihtiyaç duyuyor musunuz?
- Evet  Hayır
24. Meslektaşlarımızla genetik bilgilerin açıklanması ve paylaşılmasının sosyal ve etik yönlerini tartışmaya ihtiyaç duyuyor musunuz?
- Evet  Hayır
25. Sizce devlet genetik test yaptıracak herkese genetik danışmanlık sağlamalı mıdır?
- Evet  Hayır

**IV. OLGULAR:** Aşağıdaki olgular etik konuları göz önünde bulundurularak senaryolaştırılmış gerçek olgulardır. Hasta ve hekimlerin gerçek isimleri kullanılmamıştır. Lütfen kendinizi her bir vakadaki hekimin yerine koyarak size en uygun gelen ifadeyi işaretleyiniz.

**OLGU A.** 26 yaşındaki Nurgül prematüre bir bebek dünyaya getirir. Bebeğe hipertelorizm, simian çizgisi, frau yarığı, endokardiyal yastık defekti, kronik akciğer hastalığı ve pulmoner hipertansiyon bulunmaktadır. Down sendromundan şüphelenen yenidoğan uzmanının önerdiği testle kromozom anomalisi belirlenir. Tekrar çocuk doğurmayı düşünen anne, ısrarla Down sendromunun nedeninin araştırılmasını, kendisine ve eşine test yapılmasını ister. Babanın gönülsüzlüğünü gören yenidoğan uzmanı, gelecekteki gebelikte yaptırabilecekleri prenatal tanı testleri hakkında bilgi verir. İki hafta sonra Nurgül ile onun aşırı ısrarına dayanamayan eşi Mahmut test için başvururlar. Test sonucunda babanın dengeli translokasyon taşıyıcısı olduğu belirlenir. Mahmut'un kendisinden daha genç ve çocuk sahibi olma potansiyeli olan birkaç kardeşi daha vardır. Dr. Gül dengeli taşıyıcılık bilgisini birinci derece yakınlarıyla ve tekrar çocuk doğurmayı planlayan eşiyle paylaşmasını önerir. Mahmut ise akrabalarıyla ilişkilerinin çok da iyi olmadığını, ayrıca tekrar çocuk sahibi olmayı da planlamadığını söyler. Bu nedenle diğer aile üyelerine ve eşine test sonucunun söylenmemesinde ısrar eder.

26. Hekim, Mahmut'un kararına saygı duymalıdır.
- Katılıyorum  Kararsızım  Katılmıyorum
27. Hekim, sonucu Mahmut'un eşine bildirmelidir.
- Katılıyorum  Kararsızım  Katılmıyorum
28. Hekim aile birliğini korumak adına Nurgül'e gerçeği açıklamamalıdır.
- Katılıyorum  Kararsızım  Katılmıyorum
29. Hekim, Mahmut'un kardeşlerini sonuçtan haberdar etmelidir.
- Katılıyorum  Kararsızım  Katılmıyorum
30. Mahmut'un, kardeşlerine açıklama yapma ve onları test yaptırmaya yönlendirme yükümlülüğü olmalıdır.
- Katılıyorum  Kararsızım  Katılmıyorum
31. Bu tür durumlarda devlet, ücretsiz test yapmakla yükümlü olmalıdır.
- Katılıyorum  Kararsızım  Katılmıyorum

**OLGU B.** 21 yaşındaki Fevziye fiziksel görünümünde, cinsel organlarında ve duygularındaki farklılıklardan dolayı bir kadın doğum uzmanına başvurur. Psödohermafrodit olduğu belirlenen hastanın karyotip analizi sonucunda 46 XY ve 5-alfa reduktaz gen mutasyonuna sahip olduğu saptanır. Fevziye'yle sonuçlar hakkında görüşüldüğünde böyle bir sonuç beklediğini, zaten duygusal olarak da erkek gibi hissettiğini söyler. Dr. Erol, Fevziye'nin 16 yaşındaki kız kardeşi Şükriye'de de fiziksel görünümünden dolayı benzer mutasyondan şüphelenir ve aynı testlerin ona da yapılmasını önerir. Çünkü mutasyonun 1:8 oranında diğer kardeşte de görülme ihtimali vardır. Fakat Fevziye bu öneriye şiddetle karşı çıkar. Kardeşi liseyi bitirdiğinde ona testleri yaptıracağına söz verir. Ancak Dr. Erol, test yapılmasının ertelenmesinin kardeşine zarar verebileceğini, kardeşinin duygusal sorunlar yaşayabileceğini açıklayarak test yapılması hakkında ısrar eder.

**32. Hekim, Fevziye'nin kararına saygı duymalıdır.**

Katılıyorum  Kararsızım  Katılmıyorum

**33. Hekim dosya bilgilerinden aileye ulaşarak Şükriye'ye de test yaptırılması gerektiğini söylemelidir.**

Katılıyorum  Kararsızım  Katılmıyorum

**34. Hekim, Şükriye'ye ulaşarak kendisine de abisine/ablasına yapılan testlerin yapılması gerektiğini söylemelidir.**

Katılıyorum  Kararsızım  Katılmıyorum

**35. Fevziye kabul etmese dahi aile üyelerini uyarmak, hekimin yasal yükümlülüğü olmalıdır.**

Katılıyorum  Kararsızım  Katılmıyorum

**36. Fevziye'nin, kardeşine açıklama yapma ve onu test yaptırmaya cesaretlendirme ödevi olmalıdır.**

Katılıyorum  Kararsızım  Katılmıyorum

**37. Bu tür durumlarda devlet, ücretsiz test yapmakla yükümlü olmalıdır.**

Katılıyorum  Kararsızım  Katılmıyorum

**OLGU C.** On beş aylık olan bebek Can dördüncü ayından beri solukluk, huzursuzluk, uykusuzluk, iyi kilo alamama yakınmalarıyla getirilmiştir. Öyküsünden birkaç kez kan nakli yapıldığı öğrenilir. Çocuk hematoloğu Dr. Nazlı tarafından talasemi majör tanısı konur. Taşıyıcı olan ebeveynler çocuklarının bu durumuna çok üzülmeyle birlikte özellikle anne, ikinci bir çocuk doğurmayı planlamaktadır. Bu nedenle taşıyıcı olabilecek diğer aile üyelerinin bu konudan haberdar edilmesini istememektedir.

**38. Hekim, planladığı gebelik için anneyi prenatal tanı testi seçenekleri hakkında bilgilendirmelidir.**

Katılıyorum  Kararsızım  Katılmıyorum

**39. Hekim, talasemi majör hastası bir başka çocuk dünyaya getirmemeye çifti ikna etmeye çalışmalıdır.**

Katılıyorum  Kararsızım  Katılmıyorum

**40. Hekim, akrabalarını tanıyla ilgili bilgilendirmeleri hakkında bebek Can'ın ebeveynini uyarmalıdır.**

Katılıyorum  Kararsızım  Katılmıyorum

**41. Çiftin akrabalarını uyardıklarından hekim emin olmalıdır.**

Katılıyorum  Kararsızım  Katılmıyorum

**42. Çiftin akrabalarını uyarmak hekimin yasal ödevi olmalıdır.**

Katılıyorum  Kararsızım  Katılmıyorum

**43. Devletin gelecek kuşakların sağlığını korumak adına bu testleri ücretsiz yaptırma yükümlülüğü olmalıdır.**

Katılıyorum  Kararsızım  Katılmıyorum

**OLGU D.** 14 yaşındaki Mustafa bir üniversite hastanesine tansiyon artışı nedeniyle başvurur. Mustafa yaşına göre kısa boyludur ve androjeni yüksektir. Fenotipi erkek olan çocuğun kromozom analizinden de 46XY olduğu belirlenir. Çocuk endokrinoloğu Dr. Figen, hastanın dosyasından onun bebekliğinde bir başka üniversite hastanesinde konjenital adrenal hiperplazi tanısı almış olduğunu öğrenir. Tanıyı koyan hastanedeki meslektaşıyla yaptığı görüşmede Mustafa'nın amcasının kızı olan Ayşe'nin de aynı tanıyı aldığını, fakat kız olarak yetiştirildiğini öğrenir. Bu bilgiyi Mustafa'nın ailesiyle paylaşır. Baba yıllardır konuşmadığı erkek kardeşiyle görüşerek Mustafa ile Ayşe'nin hastalığından söz eder. Bunun üzerine Ayşe'nin ailesi kendilerine ait bilgileri izinleri olmaksızın paylaştığı için tanıyı koyan üniversite hastanesine karşı dava açar.

**44. İlk tanıyı koyan hekim, bilgi sahiplerinin iznini almadan bu bilgileri paylaşmamalıdır.**

Katılıyorum  Kararsızım  Katılmıyorum

**45. Dr. Figen, meslektaşından öğrendiği bilgileri hastasının ailesine açıklamamalıdır.**

Katılıyorum  Kararsızım  Katılmıyorum

**46. Hekim, Ayşe'nin genetik bilgilerinin sadece Mustafa'ya açıklamalıdır.**

Katılıyorum  Kararsızım  Katılmıyorum

**47. Ayşe'nin ebeveyni, Mustafa'yı da ilgilendiren bu bilgileri daha önce kardeşinin ailesiyle paylaşmalıydı.**

Katılıyorum  Kararsızım  Katılmıyorum

**48. Genetik bilgiler, meslektaşlar arasında olsa bile yasal düzenlemelere göre paylaşılmalıdır.**

Katılıyorum  Kararsızım  Katılmıyorum

**49. Hastanenin/hekimlerin genetik bilgilerin emniyetini sağlama yükümlülüğü olmalıdır.**

Katılıyorum  Kararsızım  Katılmıyorum
